# Supplementary material
Source: MDPI journal article supplement (https://www.mdpi.com/2073-4441/12/10/2932)
Supplement: s1 [file s1]

### Supplementary Materials:

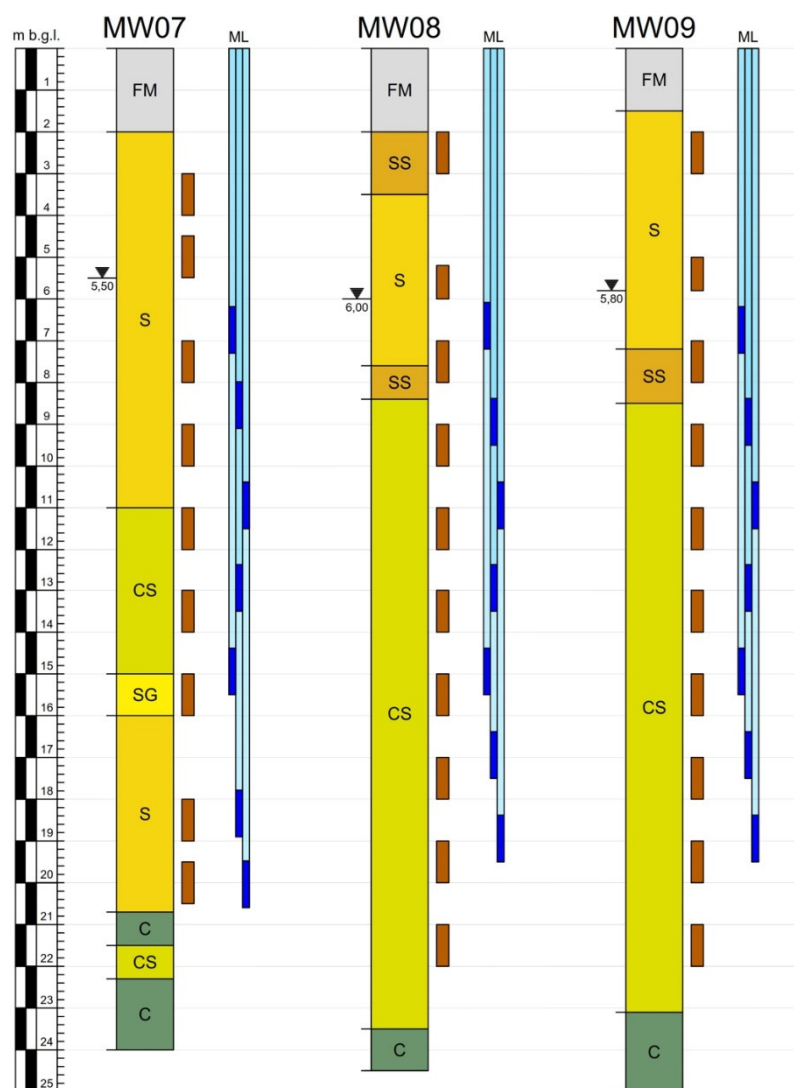

**Figure S1.** Simplified stratigraphic logs of the three monitoring wells drilled in 2018. **FM:** fill material; **SS:** fine sand with silt; **S:** sand; **CS:** coarse sand; **SG:** sand with gravel; **C:** clay. Brown boxes represent sediments core samples; light blues columns represent simplified construction schemes of Continuous Multichannel Tubing system (named ML).

**Table S1.** Sediments sampling elevation collected in 2018 sampling survey, CMT elevation levels and groundwater sampling elevation and As content in sediment and groundwater.

| MW07              | As     | MW07-ML           | As   | MW08              | As     | MW08-ML           | As    | MW09              | As     | MW09-ML           | As    |
|-------------------|--------|-------------------|------|-------------------|--------|-------------------|-------|-------------------|--------|-------------------|-------|
| Depth<br>m a.s.l. | mg/kg  | Depth<br>m a.s.l. | mg/L | Depth<br>m a.s.l. | mg/kg  | Depth<br>m a.s.l. | mg/L  | Depth<br>m a.s.l. | mg/kg  | Depth<br>m a.s.l. | mg/L  |
| 2.0               | 129.4  | -1.7              | 0.27 | 2.5               | 18.45  | 13.9              | 0.013 | 2.5               | 14.45  | 13.0              | 0.018 |
| 0.5               | 81.06  | -3.5              | 1.4  | -0.6              | 30.05  | 9.9               | 1.8   | -0.4              | 10.77  | 45.2              | 0.23  |
| -2.0              | 54.52  | -5.9              | 1.3  | -2.5              | 26.25  | 7.0               | 4.4   | -2.5              | 19.06  | 7.8               | 3.7   |
| -4.0              | 155.10 | -7.9              | 1.2  | -4.5              | 90.87  | 260.7             | 1.2   | -4.5              | 128.10 | 14.0              | 7.2   |
| -6.0              | 182.90 | -9.9              | 2.3  | -6.5              | 175.10 | 63.2              | 110   | -6.5              | 174.10 | 12.1              | 13    |
| -8.0              | 242.60 | -13.3             | 21   | -8.5              | 116.60 | 69.0              | 53    | -8.5              | 236.30 | 11.8              | 35    |
| -10.0             | 173.10 | -14.8             | 17   | -10.5             | 468.50 |                   |       | -10.5             | 120.70 |                   |       |
| -13.0             | 89.07  |                   |      | -12.5             | 223.30 |                   |       | -12.5             | 221.80 |                   |       |
| -14.5             | 95.44  |                   |      | -14.5             | 118.70 |                   |       | -14.5             | 141.80 |                   |       |
|                   |        |                   |      | -16.5             | 68.13  |                   |       | -16.5             | 20.54  |                   |       |

**Table S2a.** Pearson correlation matrix for MW07-ML.

|              | <i>C-alkalinity</i> | <i>Eh</i> | <i>EC</i> | <i>pH</i> | <i>Al</i> | <i>As</i> | <i>B</i> | <i>Ca</i> | <i>DOC</i> | <i>Cl</i> | <i>Fe</i> | <i>Mg</i> | <i>Mn</i> | <i>CH4</i> | <i>Ni</i> | <i>NO3-</i> | <i>NH4+</i> | <i>K</i> | <i>Na</i> | <i>SO42-</i> | <i>TDS</i> |
|--------------|---------------------|-----------|-----------|-----------|-----------|-----------|----------|-----------|------------|-----------|-----------|-----------|-----------|------------|-----------|-------------|-------------|----------|-----------|--------------|------------|
| C-alkalinity | 1                   |           |           |           |           |           |          |           |            |           |           |           |           |            |           |             |             |          |           |              |            |
| Eh           | -0.64               | 1         |           |           |           |           |          |           |            |           |           |           |           |            |           |             |             |          |           |              |            |
| EC           | 0.78                | -0.89     | 1         |           |           |           |          |           |            |           |           |           |           |            |           |             |             |          |           |              |            |
| pH           | -0.03               | 0.52      | -0.59     | 1         |           |           |          |           |            |           |           |           |           |            |           |             |             |          |           |              |            |
| Al           | 0.27                | 0.22      | -0.09     | 0.69      | 1         |           |          |           |            |           |           |           |           |            |           |             |             |          |           |              |            |
| As           | 0.57                | -0.93     | 0.73      | -0.30     | -0.20     | 1         |          |           |            |           |           |           |           |            |           |             |             |          |           |              |            |
| B            | 0.70                | -0.92     | 0.99      | -0.68     | -0.23     | 0.77      | 1        |           |            |           |           |           |           |            |           |             |             |          |           |              |            |
| Ca           | -0.12               | -0.47     | 0.51      | -0.87     | -0.43     | 0.31      | 0.59     | 1         |            |           |           |           |           |            |           |             |             |          |           |              |            |
| DOC          | -0.12               | -0.13     | -0.14     | 0.28      | -0.11     | 0.45      | -0.09    | -0.06     | 1          |           |           |           |           |            |           |             |             |          |           |              |            |
| Cl           | 0.71                | -0.88     | 0.99      | -0.65     | -0.12     | 0.71      | 0.99     | 0.61      | -0.14      | 1         |           |           |           |            |           |             |             |          |           |              |            |
| Fe           | 0.92                | -0.66     | 0.89      | -0.34     | 0.14      | 0.47      | 0.82     | 0.17      | -0.38      | 0.85      | 1         |           |           |            |           |             |             |          |           |              |            |
| Mg           | 0.42                | -0.82     | 0.89      | -0.81     | -0.28     | 0.65      | 0.93     | 0.84      | -0.09      | 0.94      | 0.62      | 1         |           |            |           |             |             |          |           |              |            |
| Mn           | 0.83                | -0.71     | 0.83      | -0.46     | -0.23     | 0.56      | 0.82     | 0.13      | -0.34      | 0.77      | 0.89      | 0.58      | 1         |            |           |             |             |          |           |              |            |
| CH4          | 0.99                | -0.61     | 0.79      | -0.09     | 0.25      | 0.50      | 0.71     | -0.09     | -0.26      | 0.72      | 0.96      | 0.43      | 0.86      | 1          |           |             |             |          |           |              |            |
| Ni           | 0.95                | -0.81     | 0.92      | -0.31     | 0.11      | 0.67      | 0.87     | 0.17      | -0.20      | 0.88      | 0.96      | 0.66      | 0.88      | 0.95       | 1         |             |             |          |           |              |            |
| NO3-         | -0.20               | 0.39      | -0.41     | 0.65      | 0.79      | -0.31     | -0.48    | -0.36     | -0.08      | -0.41     | -0.30     | -0.41     | -0.50     | -0.21      | -0.32     | 1           |             |          |           |              |            |
| NH4+         | 0.55                | -0.10     | 0.10      | 0.43      | 0.11      | 0.23      | 0.04     | -0.58     | 0.38       | 0.01      | 0.29      | -0.26     | 0.28      | 0.49       | 0.35      | -0.34       | 1           |          |           |              |            |
| K            | 0.86                | -0.91     | 0.98      | -0.44     | -0.01     | 0.80      | 0.96     | 0.37      | -0.02      | 0.96      | 0.89      | 0.81      | 0.83      | 0.84       | 0.95      | -0.36       | 0.24        | 1        |           |              |            |
| Na           | 0.88                | -0.86     | 0.98      | -0.44     | 0.03      | 0.72      | 0.95     | 0.35      | -0.13      | 0.96      | 0.94      | 0.79      | 0.86      | 0.89       | 0.97      | -0.35       | 0.23        | 0.99     | 1         |              |            |
| SO42-        | 0.77                | -0.89     | 1.00      | -0.63     | -0.17     | 0.72      | 0.99     | 0.52      | -0.16      | 0.99      | 0.88      | 0.89      | 0.86      | 0.78       | 0.91      | -0.47       | 0.10        | 0.97     | 0.97      | 1            |            |
| TDS          | 0.74                | -0.88     | 1.00      | -0.63     | -0.11     | 0.71      | 0.99     | 0.58      | -0.14      | 1.00      | 0.86      | 0.92      | 0.79      | 0.74       | 0.89      | -0.41       | 0.04        | 0.96     | 0.97      | 0.99         | 1          |

**Table S2b.** Pearson correlation matrix for MW08-ML.

|              | <i>C-alkalinity</i> | <i>Eh</i> | <i>EC</i> | <i>pH</i> | <i>Al</i> | <i>As</i> | <i>B</i> | <i>Ca</i> | <i>DOC</i> | <i>Cl</i> | <i>Fe</i> | <i>Mg</i> | <i>Mn</i> | <i>CH4</i> | <i>Ni</i> | <i>NO3-</i> | <i>NH4+</i> | <i>K</i> | <i>Na</i> | <i>SO42-</i> | <i>TDS</i> |
|--------------|---------------------|-----------|-----------|-----------|-----------|-----------|----------|-----------|------------|-----------|-----------|-----------|-----------|------------|-----------|-------------|-------------|----------|-----------|--------------|------------|
| C-alkalinity | 1                   |           |           |           |           |           |          |           |            |           |           |           |           |            |           |             |             |          |           |              |            |
| Eh           | 0.74                | 1         |           |           |           |           |          |           |            |           |           |           |           |            |           |             |             |          |           |              |            |
| EC           | -0.51               | -0.92     | 1         |           |           |           |          |           |            |           |           |           |           |            |           |             |             |          |           |              |            |
| pH           | -0.31               | -0.18     | -0.12     | 1         |           |           |          |           |            |           |           |           |           |            |           |             |             |          |           |              |            |
| Al           | -0.29               | -0.41     | 0.57      | -0.20     | 1         |           |          |           |            |           |           |           |           |            |           |             |             |          |           |              |            |
| As           | -0.69               | -0.48     | 0.28      | 0.66      | 0.20      | 1         |          |           |            |           |           |           |           |            |           |             |             |          |           |              |            |
| B            | -0.80               | -0.97     | 0.89      | 0.23      | 0.56      | 0.55      | 1        |           |            |           |           |           |           |            |           |             |             |          |           |              |            |
| Ca           | 0.62                | 0.53      | -0.23     | -0.90     | 0.09      | -0.80     | -0.57    | 1         |            |           |           |           |           |            |           |             |             |          |           |              |            |
| DOC          | 0.45                | 0.24      | -0.03     | 0.04      | 0.51      | -0.09     | -0.10    | 0.14      | 1          |           |           |           |           |            |           |             |             |          |           |              |            |
| Cl           | -0.48               | -0.92     | 0.99      | -0.14     | 0.49      | 0.22      | 0.85     | -0.21     | -0.12      | 1         |           |           |           |            |           |             |             |          |           |              |            |
| Fe           | -0.49               | -0.89     | 0.95      | -0.10     | 0.39      | 0.37      | 0.80     | -0.27     | -0.18      | 0.96      | 1         |           |           |            |           |             |             |          |           |              |            |
| Mg           | -0.28               | -0.79     | 0.94      | -0.38     | 0.46      | -0.01     | 0.70     | 0.04      | -0.08      | 0.96      | 0.91      | 1         |           |            |           |             |             |          |           |              |            |
| Mn           | -0.36               | -0.82     | 0.90      | -0.31     | 0.34      | -0.07     | 0.72     | -0.02     | -0.25      | 0.94      | 0.85      | 0.96      | 1         |            |           |             |             |          |           |              |            |
| CH4          | -0.54               | -0.93     | 0.99      | -0.12     | 0.59      | 0.24      | 0.90     | -0.22     | -0.07      | 0.99      | 0.92      | 0.93      | 0.92      | 1          |           |             |             |          |           |              |            |
| Ni           | -0.39               | -0.63     | 0.67      | -0.11     | 0.66      | -0.10     | 0.70     | -0.07     | 0.16       | 0.64      | 0.42      | 0.61      | 0.69      | 0.74       | 1         |             |             |          |           |              |            |
| NO3-         | 0.39                | 0.61      | -0.54     | -0.58     | -0.36     | -0.57     | -0.69    | 0.73      | -0.42      | -0.47     | -0.46     | -0.31     | -0.26     | -0.50      | -0.40     | 1           |             |          |           |              |            |
| NH4+         | 0.77                | 0.64      | -0.49     | -0.30     | -0.07     | -0.60     | -0.67    | 0.65      | 0.22       | -0.44     | -0.49     | -0.29     | -0.32     | -0.45      | -0.20     | 0.63        | 1           |          |           |              |            |
| K            | -0.53               | -0.73     | 0.72      | 0.35      | 0.55      | 0.79      | 0.76     | -0.57     | 0.18       | 0.66      | 0.75      | 0.50      | 0.37      | 0.66       | 0.23      | -0.72       | -0.50       | 1        |           |              |            |
| Na           | -0.52               | -0.94     | 0.99      | -0.07     | 0.50      | 0.29      | 0.89     | -0.28     | -0.10      | 1.00      | 0.96      | 0.94      | 0.91      | 0.99       | 0.64      | -0.53       | -0.49       | 0.71     | 1         |              |            |
| SO42-        | -0.11               | -0.59     | 0.83      | -0.38     | 0.81      | -0.05     | 0.61     | 0.18      | 0.40       | 0.79      | 0.69      | 0.84      | 0.73      | 0.82       | 0.72      | -0.38       | -0.07       | 0.53     | 0.78      | 1            |            |
| TDS          | -0.48               | -0.91     | 0.99      | -0.16     | 0.53      | 0.23      | 0.86     | -0.19     | -0.08      | 1.00      | 0.96      | 0.96      | 0.93      | 0.99       | 0.66      | -0.47       | -0.43       | 0.68     | 1.00      | 0.82         | 1          |

**Table S2c.** Pearson correlation matrix for MW09-ML.

|              | <i>C-alkalinity</i> | <i>Eh</i> | <i>EC</i> | <i>pH</i> | <i>Al</i> | <i>As</i> | <i>B</i> | <i>Ca</i> | <i>DOC</i> | <i>Cl</i> | <i>Fe</i> | <i>Mg</i> | <i>Mn</i> | <i>CH4</i> | <i>Ni</i> | <i>NO3-</i> | <i>NH4+</i> | <i>K</i> | <i>Na</i> | <i>SO42-</i> | <i>TOC</i> |
|--------------|---------------------|-----------|-----------|-----------|-----------|-----------|----------|-----------|------------|-----------|-----------|-----------|-----------|------------|-----------|-------------|-------------|----------|-----------|--------------|------------|
| C-alkalinity | 1                   |           |           |           |           |           |          |           |            |           |           |           |           |            |           |             |             |          |           |              |            |
| Eh           | -0.77               | 1         |           |           |           |           |          |           |            |           |           |           |           |            |           |             |             |          |           |              |            |
| EC           | 0.14                | -0.24     | 1         |           |           |           |          |           |            |           |           |           |           |            |           |             |             |          |           |              |            |
| pH           | -0.21               | 0.05      | -0.86     | 1         |           |           |          |           |            |           |           |           |           |            |           |             |             |          |           |              |            |
| Al           | -0.40               | 0.00      | 0.38      | -0.38     | 1         |           |          |           |            |           |           |           |           |            |           |             |             |          |           |              |            |
| As           | -0.14               | 0.27      | 0.23      | -0.55     | 0.46      | 1         |          |           |            |           |           |           |           |            |           |             |             |          |           |              |            |
| B            | -0.41               | 0.04      | 0.43      | -0.16     | 0.54      | -0.22     | 1        |           |            |           |           |           |           |            |           |             |             |          |           |              |            |
| Ca           | 0.02                | -0.34     | 0.17      | 0.19      | 0.05      | -0.52     | 0.76     | 1         |            |           |           |           |           |            |           |             |             |          |           |              |            |
| DOC          | 0.85                | -0.43     | 0.28      | -0.55     | -0.24     | 0.11      | -0.35    | -0.22     | 1          |           |           |           |           |            |           |             |             |          |           |              |            |
| Cl           | -0.10               | -0.10     | 0.96      | -0.77     | 0.48      | 0.26      | 0.54     | 0.22      | 0.03       | 1         |           |           |           |            |           |             |             |          |           |              |            |
| Fe           | -0.31               | 0.42      | 0.24      | -0.55     | 0.49      | 0.95      | -0.23    | -0.67     | 0.00       | 0.29      | 1         |           |           |            |           |             |             |          |           |              |            |
| Mg           | -0.31               | -0.07     | 0.72      | -0.41     | 0.58      | -0.05     | 0.91     | 0.65      | -0.27      | 0.82      | -0.04     | 1         |           |            |           |             |             |          |           |              |            |
| Mn           | -0.39               | 0.31      | 0.55      | -0.71     | 0.79      | 0.80      | 0.36     | -0.17     | -0.05      | 0.63      | 0.81      | 0.50      | 1         |            |           |             |             |          |           |              |            |
| CH4          | -0.33               | 0.72      | 0.22      | -0.48     | -0.09     | 0.59      | -0.26    | -0.60     | 0.05       | 0.26      | 0.70      | -0.11     | 0.47      | 1          |           |             |             |          |           |              |            |
| Ni           | -0.38               | 0.07      | 0.56      | -0.45     | 0.78      | 0.12      | 0.91     | 0.49      | -0.18      | 0.64      | 0.12      | 0.89      | 0.67      | -0.10      | 1         |             |             |          |           |              |            |
| NO3-         | 0.34                | -0.49     | -0.61     | 0.76      | -0.43     | -0.47     | -0.21    | 0.41      | -0.12      | -0.62     | -0.63     | -0.36     | -0.73     | -0.72      | -0.47     | 1           |             |          |           |              |            |
| NH4+         | 0.89                | -0.65     | 0.48      | -0.54     | -0.29     | 0.06      | -0.40    | -0.17     | 0.85       | 0.25      | -0.03     | -0.15     | -0.12     | 0.01       | -0.29     | -0.04       | 1           |          |           |              |            |
| K            | 0.63                | -0.43     | 0.59      | -0.69     | -0.07     | 0.37      | -0.46    | -0.45     | 0.68       | 0.42      | 0.36      | -0.12     | 0.18      | 0.29       | -0.24     | -0.32       | 0.90        | 1        |           |              |            |
| Na           | -0.36               | 0.20      | 0.85      | -0.74     | 0.56      | 0.39      | 0.61     | 0.17      | -0.12      | 0.94      | 0.44      | 0.83      | 0.79      | 0.42       | 0.74      | -0.74       | -0.01       | 0.21     | 1         |              |            |
| SO42-        | 0.87                | -0.80     | 0.51      | -0.48     | -0.08     | -0.12     | 0.05     | 0.31      | 0.79       | 0.30      | -0.29     | 0.18      | -0.09     | -0.37      | 0.10      | 0.13        | 0.83        | 0.59     | 0.06      | 1            |            |
| TOC          | -0.12               | -0.12     | 0.94      | -0.68     | 0.47      | 0.09      | 0.67     | 0.37      | -0.02      | 0.98      | 0.13      | 0.90      | 0.55      | 0.14       | 0.71      | -0.56       | 0.19        | 0.30     | 0.92      | 0.31         | 1          |

**Table S3.** Sequential extraction results from 2016 sampling survey.

|      | Elevation<br>m a.s.l. | Loosely<br>adsorbed<br>As<br>(%) | Strongly<br>adsorbed<br>As<br>(%) | As co-precipitated with AVS<br>and amorphous metal oxides<br>(%) | As included in<br>mineral phases<br>(%) |
|------|-----------------------|----------------------------------|-----------------------------------|------------------------------------------------------------------|-----------------------------------------|
| MW04 | 0.6                   | 0.40                             | 7.99                              | 4.67                                                             | 86.95                                   |
|      | -1.2                  | 0.06                             | 7.27                              | 7.27                                                             | 81.89                                   |
|      | -3.4                  | 0.59                             | 6.74                              | 6.74                                                             | 82.64                                   |
|      | -8.4                  | 2.23                             | 7.62                              | 7.62                                                             | 78.80                                   |
|      | -13.4                 | 0.77                             | 5.69                              | 5.69                                                             | 84.21                                   |
|      | -18.4                 | 3.41                             | 19.45                             | 11.21                                                            | 65.93                                   |
| MW05 | 0.6                   | 0.96                             | 5.98                              | 5.79                                                             | 87.27                                   |
|      | -1.4                  | 0.92                             | 5.77                              | 14.37                                                            | 78.94                                   |
|      | -3.4                  | 0.75                             | 7.72                              | 9.63                                                             | 81.90                                   |
|      | -8.4                  | 2.50                             | 17.25                             | 36.66                                                            | 43.58                                   |
|      | -13.4                 | 2.52                             | 24.19                             | 26.04                                                            | 47.25                                   |
|      | -18.4                 | 2.75                             | 18.58                             | 21.61                                                            | 57.06                                   |
| MW06 | 2.8                   | 0.42                             | 12.54                             | 27.46                                                            | 59.59                                   |
|      | 0.8                   | 0.04                             | 19.28                             | 33.11                                                            | 47.57                                   |
|      | -1.2                  | 10.08                            | 10.31                             | 12.16                                                            | 67.45                                   |
|      | -6.2                  | 0.58                             | 7.71                              | 6.30                                                             | 85.41                                   |
|      | -11.2                 | 0.78                             | 8.80                              | 10.05                                                            | 80.37                                   |
|      | -16.2                 | 0.74                             | 8.57                              | 11.04                                                            | 79.65                                   |
